# Supplementary material for: Opting Out of Medicaid Expansion: Impact on Encounters With Behavioral Health Specialty Staff in Community Health Centers
Source: Atypon-hosted journal article supplement (doi:10.1176/appi.ps.201400361), 2015-08-17
Supplement: appi.ps.201400361.ds001.pdf [file appi.ps.201400361.ds001.pdf]

Supplemental Table 1: Estimated payment gaps and estimated loss per patient in states that opted out of Medicaid expansion in 2014, 2020

|                                             | <b>Medicaid</b> | <b>Marketplace</b> | <b>Other public</b> | <b>Private</b> | <b>Self-pay</b> | <b>Medicare</b> |
|---------------------------------------------|-----------------|--------------------|---------------------|----------------|-----------------|-----------------|
| <b>Average revenue per patient - 2012</b>   | \$583           | n/a                | \$445               | \$330          | \$121           | \$474           |
| <b>Estimated revenue per patient – 2020</b> | \$798           | \$613              | \$609               | \$452          | \$166           | \$837           |
| <b>Average costs per patient – 2012</b>     | \$731           | n/a                | \$928               | \$560          | \$513           | \$752           |
| <b>Estimated cost per patient – 2020</b>    | \$1,000         | \$883              | \$1,270             | \$766          | \$702           | \$1,030         |
| <b>Payment gap in 2020</b>                  | 20.2%           | 30.6%              | 52.0%               | 41.0%          | 76.4%           | 18.7%           |

Source: Uniform Data System, 2012.

Note: The payment gap is the shortfall between the costs of providing care for patients in each payment category and the revenue in each category.
